# Supplementary material for: Prediction of present and future spatial occurrence of cyanobacteria and the toxin nodularin in the Baltic Sea
Source: Copernicus journal article supplement (doi:10.5194/egusphere-2025-3290), 2025-08-11
Supplement: Supplementary file 1 [file egusphere-2025-3290-supplement.zip]

**Supplementary tables:**

**Prediction of present and future spatial occurrence of cyanobacteria and the toxin nodularin in the Baltic Sea**

Mohanad Abdelgadir<sup>1\*</sup>, Bengt Karlson<sup>2</sup>, Elin Dahlgren<sup>3</sup>, Malin Olofsson<sup>1</sup>

<sup>1</sup>Department of Aquatic Sciences and Assessment, Swedish University of Agricultural Sciences, Box 7050, 750 07, Uppsala, Sweden.

<sup>2</sup>Department of Research and Development, Oceanography, Swedish Meteorological and Hydrological Institute, SMHI, Västra Frölunda, Sweden.

<sup>3</sup>Department of Aquatic Resources, Swedish University of Agricultural Sciences, Stångholmsvägen 2, SE-178 93 Drottningholm, Sweden.

**Table S1.** Results of the analysis of Bayesian linear regression for current environmental variables

| Model Comparison                                                             |                |                |                 |                 |                |
|------------------------------------------------------------------------------|----------------|----------------|-----------------|-----------------|----------------|
| Models                                                                       | P(M)           | P(M data)      | BFM             | BF10            | R <sup>2</sup> |
| Null model                                                                   | 0.00781        | 9.45E-05       | 0.012           | 1               | 0              |
| <b>Salinity + Temperature + Dist-to-shore</b>                                | <b>0.00781</b> | <b>0.15891</b> | <b>23.99514</b> | <b>1682.346</b> | <b>0.23489</b> |
| <b>PO4 + Salinity + Temperature + Dist-to-shore</b>                          | <b>0.00781</b> | <b>0.09717</b> | <b>13.6681</b>  | <b>1028.649</b> | <b>0.24838</b> |
| Salinity + Temperature + NO3:PO4 + Dist-to-shore                             | 0.00781        | 0.05778        | 7.78753         | 611.653         | 0.23903        |
| NO3-2 + Salinity + Temperature + Dist-to-shore                               | 0.00781        | 0.04838        | 6.45605         | 512.134         | 0.2358         |
| Salinity + Chlorophyll + Temperature + Dist-to-shore                         | 0.00781        | 0.04785        | 6.38176         | 506.522         | 0.2356         |
| Salinity + NO3:PO4 + Dist-to-shore                                           | 0.00781        | 0.0438         | 5.81739         | 463.69          | 0.21165        |
| PO4 + Salinity + Temperature + NO3:PO4 + Dist-to-shore                       | 0.00781        | 0.04256        | 5.64597         | 450.608         | 0.25423        |
| PO4 + Salinity + Chlorophyll + Temperature + Dist-to-shore                   | 0.00781        | 0.0379         | 5.003           | 401.237         | 0.25211        |
| NO3-2 + PO4 + Salinity + Temperature + Dist-to-shore                         | 0.00781        | 0.03474        | 4.5708          | 367.779         | 0.25052        |
| NO3-2 + Salinity + Temperature + NO3:PO4 + Dist-to-shore                     | 0.00781        | 0.02691        | 3.51195         | 284.874         | 0.24582        |
| NO3-2 + Salinity + Dist-to-shore                                             | 0.00781        | 0.02576        | 3.35844         | 272.743         | 0.20182        |
| PO4 + Salinity + NO3:PO4 + Dist-to-shore                                     | 0.00781        | 0.02473        | 3.22024         | 261.797         | 0.22345        |
| Salinity + Dist-to-shore                                                     | 0.00781        | 0.02173        | 2.82165         | 230.097         | 0.17404        |
| Salinity + Chlorophyll + Temperature + NO3:PO4 + Dist-to-shore               | 0.00781        | 0.01916        | 2.48127         | 202.872         | 0.23952        |
| NO3-2 + PO4 + Salinity + Temperature + NO3:PO4 + Dist-to-shore               | 0.00781        | 0.01902        | 2.46263         | 201.377         | 0.259          |
| PO4 + Salinity + Chlorophyll + Temperature + NO3:PO4 + Dist-to-shore         | 0.00781        | 0.01758        | 2.27304         | 186.146         | 0.25754        |
| NO3-2 + Salinity + NO3:PO4 + Dist-to-shore                                   | 0.00781        | 0.01616        | 2.08656         | 171.121         | 0.21548        |
| NO3-2 + Salinity + Chlorophyll + Temperature + Dist-to-shore                 | 0.00781        | 0.01608        | 2.07599         | 170.268         | 0.23624        |
| NO3-2 + PO4 + Salinity + Dist-to-shore                                       | 0.00781        | 0.01468        | 1.89202         | 155.402         | 0.21367        |
| NO3-2 + PO4 + Salinity + Chlorophyll + Temperature + Dist-to-shore           | 0.00781        | 0.01409        | 1.81524         | 149.184         | 0.2534         |
| Salinity + Chlorophyll + NO3:PO4 + Dist-to-shore                             | 0.00781        | 0.01365        | 1.75774         | 144.523         | 0.21229        |
| NO3-2 + Salinity + Chlorophyll + Temperature + NO3:PO4 + Dist-to-shore       | 0.00781        | 0.01129        | 1.45045         | 119.542         | 0.24923        |
| NO3-2 + PO4 + Salinity + Chlorophyll + Temperature + NO3:PO4 + Dist-to-shore | 0.00781        | 0.01077        | 1.38311         | 114.052         | 0.26704        |
| NO3-2 + PO4 + Salinity + NO3:PO4 + Dist-to-shore                             | 0.00781        | 0.0093         | 1.19233         | 98.467          | 0.22587        |
| NO3-2 + Salinity + Chlorophyll + Dist-to-shore                               | 0.00781        | 0.00879        | 1.12647         | 93.075          | 0.2039         |
| Salinity + NO3:PO4                                                           | 0.00781        | 0.00839        | 1.07475         | 88.838          | 0.15589        |
| PO4 + Salinity + Chlorophyll + NO3:PO4 + Dist-to-shore                       | 0.00781        | 0.00819        | 1.04934         | 86.755          | 0.22345        |
| PO4 + Salinity + Dist-to-shore                                               | 0.00781        | 0.00784        | 1.00295         | 82.949          | 0.17922        |
| Salinity + Chlorophyll + Temperature                                         | 0.00781        | 0.00701        | 0.89605         | 74.17           | 0.17705        |
| Salinity + Chlorophyll + Dist-to-shore                                       | 0.00781        | 0.00671        | 0.85842         | 71.077          | 0.17623        |
| NO3 + Salinity + Chlorophyll + NO3:PO4 + Dist-to-shore                       | 0.00781        | 0.00543        | 0.69375         | 57.516          | 0.21551        |
| NO3 + Salinity + Chlorophyll + Temperature + NO3:PO4                         | 0.00781        | 0.00528        | 0.67432         | 55.913          | 0.21496        |
| NO3 + PO4 + Salinity + Chlorophyll + Dist-to-shore                           | 0.00781        | 0.00507        | 0.64775         | 53.721          | 0.21418        |
| Salinity + Chlorophyll + NO3:PO4                                             | 0.00781        | 0.00507        | 0.64722         | 53.678          | 0.17075        |
| Salinity                                                                     | 0.00781        | 0.00465        | 0.59285         | 49.19           | 0.11621        |
| PO4 + Salinity + Chlorophyll + Temperature                                   | 0.00781        | 0.00437        | 0.55767         | 46.283          | 0.19034        |
| NO3 + PO4 + Salinity + Chlorophyll + Temperature + NO3:PO4                   | 0.00781        | 0.00433        | 0.55204         | 45.818          | 0.23081        |

|                                                              |         |          |         |        |         |
|--------------------------------------------------------------|---------|----------|---------|--------|---------|
| NO3 + Salinity + NO3:PO4                                     | 0.00781 | 0.00414  | 0.52835 | 43.86  | 0.16678 |
| Salinity + Temperature                                       | 0.00781 | 0.00403  | 0.51402 | 42.676 | 0.14156 |
| NO3 + Salinity                                               | 0.00781 | 0.00397  | 0.50596 | 42.009 | 0.14125 |
| PO4 + NO3:PO4 + Dist-to-shore                                | 0.00781 | 0.00394  | 0.50186 | 41.67  | 0.16577 |
| NO3 + PO4 + Dist-to-shore                                    | 0.00781 | 0.00381  | 0.48524 | 40.295 | 0.16511 |
| Salinity + Chlorophyll + Temperature + NO3:PO4               | 0.00781 | 0.00375  | 0.47762 | 39.665 | 0.1873  |
| NO3 + Salinity + Chlorophyll + NO3:PO4                       | 0.00781 | 0.00354  | 0.45113 | 37.472 | 0.18618 |
| NO3 + PO4 + Salinity + Chlorophyll + NO3:PO4 + Dist-to-shore | 0.00781 | 0.00341  | 0.43442 | 36.089 | 0.22614 |
| PO4 + Salinity + NO3:PO4                                     | 0.00781 | 0.00291  | 0.37027 | 30.776 | 0.15977 |
| Salinity + Temperature + NO3:PO4                             | 0.00781 | 0.0029   | 0.36973 | 30.731 | 0.15974 |
| PO4 + Salinity + Chlorophyll + Temperature + NO3:PO4         | 0.00781 | 0.00287  | 0.36493 | 30.333 | 0.20295 |
| PO4 + Salinity + Chlorophyll + NO3:PO4                       | 0.00781 | 0.00278  | 0.35402 | 29.429 | 0.18139 |
| PO4 + Dist-to-shore                                          | 0.00781 | 0.00276  | 0.35181 | 29.246 | 0.13406 |
| PO4 + Salinity + Chlorophyll + Dist-to-shore                 | 0.00781 | 0.00263  | 0.33472 | 27.829 | 0.18027 |
| NO3 + Salinity + Chlorophyll + Temperature                   | 0.00781 | 0.00238  | 0.30256 | 25.161 | 0.17826 |
| NO3 + Salinity + Chlorophyll                                 | 0.00781 | 0.00213  | 0.27078 | 22.524 | 0.15352 |
| NO3 + PO4 + Salinity + Chlorophyll + NO3:PO4                 | 0.00781 | 0.00201  | 0.25553 | 21.258 | 0.19585 |
| Salinity + Chlorophyll                                       | 0.00781 | 0.002    | 0.25437 | 21.161 | 0.12757 |
| NO3 + Salinity + Temperature + NO3:PO4                       | 0.00781 | 0.00188  | 0.23896 | 19.882 | 0.17353 |
| NO3 + PO4 + Salinity + Chlorophyll + Temperature             | 0.00781 | 0.00169  | 0.21439 | 17.841 | 0.19232 |
| NO3 + Salinity + Temperature                                 | 0.00781 | 0.00167  | 0.21185 | 17.63  | 0.14857 |
| NO3 + PO4 + Salinity + NO3:PO4                               | 0.00781 | 0.00155  | 0.19763 | 16.448 | 0.16969 |
| PO4 + Chlorophyll + NO3:PO4 + Dist-to-shore                  | 0.00781 | 0.00138  | 0.17501 | 14.569 | 0.16723 |
| NO3 + PO4 + Salinity                                         | 0.00781 | 0.00137  | 0.17381 | 14.469 | 0.14455 |
| PO4 + Temperature + NO3:PO4 + Dist-to-shore                  | 0.00781 | 0.00134  | 0.17047 | 14.191 | 0.16669 |
| NO3 + PO4 + NO3:PO4 + Dist-to-shore                          | 0.00781 | 0.00132  | 0.16723 | 13.922 | 0.1663  |
| PO4 + Salinity + Temperature                                 | 0.00781 | 0.00128  | 0.16339 | 13.603 | 0.14329 |
| NO3 + PO4 + Chlorophyll + Dist-to-shore                      | 0.00781 | 0.00126  | 0.15995 | 13.316 | 0.16539 |
| NO3 + PO4 + Temperature + Dist-to-shore                      | 0.00781 | 0.00126  | 0.15993 | 13.314 | 0.16539 |
| PO4 + Salinity                                               | 0.00781 | 0.00118  | 0.14999 | 12.488 | 0.11685 |
| PO4 + Salinity + Temperature + NO3:PO4                       | 0.00781 | 0.00116  | 0.14693 | 12.234 | 0.16366 |
| Dist-to-shore                                                | 0.00781 | 0.00111  | 0.14077 | 11.721 | 0.0874  |
| NO3 + PO4 + Salinity + Chlorophyll                           | 0.00781 | 0.00108  | 0.13711 | 11.417 | 0.16224 |
| PO4 + Temperature + Dist-to-shore                            | 0.00781 | 0.00101  | 0.12862 | 10.711 | 0.13839 |
| PO4 + Chlorophyll + Dist-to-shore                            | 0.00781 | 8.22E-04 | 0.10446 | 8.7    | 0.1341  |
| NO3 + PO4 + Salinity + Temperature + NO3:PO4                 | 0.00781 | 7.72E-04 | 0.09817 | 8.177  | 0.17635 |
| PO4 + Salinity + Chlorophyll                                 | 0.00781 | 7.02E-04 | 0.08921 | 7.431  | 0.13082 |
| NO3 + PO4 + Salinity + Temperature                           | 0.00781 | 6.51E-04 | 0.0827  | 6.889  | 0.15178 |
| NO3 + Dist-to-shore                                          | 0.00781 | 5.25E-04 | 0.06675 | 5.561  | 0.10007 |
| PO4 + Chlorophyll + Temperature + NO3:PO4 + Dist-to-shore    | 0.00781 | 5.07E-04 | 0.06445 | 5.37   | 0.16757 |
| NO3:PO4 + Dist-to-shore                                      | 0.00781 | 5.03E-04 | 0.06391 | 5.325  | 0.09916 |
| NO3 + PO4 + Chlorophyll + NO3:PO4 + Dist-to-shore            | 0.00781 | 5.02E-04 | 0.06373 | 5.31   | 0.16733 |
| NO3 + PO4 + Temperature + NO3:PO4 + Dist-to-shore            | 0.00781 | 4.95E-04 | 0.06294 | 5.244  | 0.16707 |
| NO3 + PO4 + Chlorophyll + Temperature + Dist-to-shore        | 0.00781 | 4.60E-04 | 0.05845 | 4.87   | 0.16551 |

|                                                                 |         |          |         |       |         |
|-----------------------------------------------------------------|---------|----------|---------|-------|---------|
| PO4 + Chlorophyll + Temperature + Dist-to-shore                 | 0.00781 | 3.63E-04 | 0.04617 | 3.847 | 0.13949 |
| Temperature + NO3:PO4 + Dist-to-shore                           | 0.00781 | 3.60E-04 | 0.04578 | 3.815 | 0.11678 |
| NO3 + Temperature + Dist-to-shore                               | 0.00781 | 3.32E-04 | 0.04222 | 3.518 | 0.11505 |
| PO4 + Chlorophyll + NO3:PO4                                     | 0.00781 | 3.23E-04 | 0.04099 | 3.416 | 0.11442 |
| Temperature + Dist-to-shore                                     | 0.00781 | 3.21E-04 | 0.04072 | 3.393 | 0.08962 |
| Chlorophyll + Dist-to-shore                                     | 0.00781 | 2.96E-04 | 0.03763 | 3.136 | 0.08793 |
| NO3 + PO4 + Chlorophyll + Temperature + NO3:PO4 + Dist-to-shore | 0.00781 | 2.01E-04 | 0.02557 | 2.131 | 0.16768 |
| NO3 + PO4 + Chlorophyll                                         | 0.00781 | 1.94E-04 | 0.02466 | 2.055 | 0.10348 |
| NO3 + Chlorophyll + Dist-to-shore                               | 0.00781 | 1.69E-04 | 0.02151 | 1.792 | 0.1005  |
| NO3 + NO3:PO4 + Dist-to-shore                                   | 0.00781 | 1.66E-04 | 0.02111 | 1.759 | 0.10009 |
| PO4 + Chlorophyll                                               | 0.00781 | 1.63E-04 | 0.02072 | 1.727 | 0.07505 |
| Chlorophyll + NO3:PO4 + Dist-to-shore                           | 0.00781 | 1.60E-04 | 0.02031 | 1.692 | 0.09924 |
| NO3 + Chlorophyll + Temperature + Dist-to-shore                 | 0.00781 | 1.38E-04 | 0.01748 | 1.457 | 0.11847 |
| NO3 + PO4 + Chlorophyll + NO3:PO4                               | 0.00781 | 1.38E-04 | 0.01747 | 1.456 | 0.11845 |
| Chlorophyll + Temperature + NO3:PO4 + Dist-to-shore             | 0.00781 | 1.37E-04 | 0.01744 | 1.453 | 0.11841 |
| PO4 + Chlorophyll + Temperature + NO3:PO4                       | 0.00781 | 1.37E-04 | 0.01738 | 1.449 | 0.11834 |
| NO3 + Temperature + NO3:PO4 + Dist-to-shore                     | 0.00781 | 1.29E-04 | 0.01635 | 1.363 | 0.117   |
| PO4 + Temperature + NO3:PO4                                     | 0.00781 | 1.16E-04 | 0.01471 | 1.226 | 0.09216 |
| Temperature + NO3:PO4                                           | 0.00781 | 1.10E-04 | 0.01396 | 1.163 | 0.0664  |
| Chlorophyll + Temperature + Dist-to-shore                       | 0.00781 | 1.10E-04 | 0.01392 | 1.161 | 0.09094 |
| PO4                                                             | 0.00781 | 1.05E-04 | 0.01336 | 1.113 | 0.03746 |
| PO4 + NO3:PO4                                                   | 0.00781 | 9.86E-05 | 0.01252 | 1.044 | 0.064   |
| NO3 + PO4                                                       | 0.00781 | 8.04E-05 | 0.01021 | 0.851 | 0.05946 |
| NO3 + PO4 + Chlorophyll + Temperature                           | 0.00781 | 7.68E-05 | 0.00975 | 0.813 | 0.10549 |
| NO3 + Temperature                                               | 0.00781 | 7.32E-05 | 0.0093  | 0.775 | 0.05737 |
| NO3 + PO4 + Temperature                                         | 0.00781 | 7.31E-05 | 0.00928 | 0.773 | 0.08189 |
| Chlorophyll                                                     | 0.00781 | 6.36E-05 | 0.00808 | 0.673 | 0.02633 |
| NO3 + PO4 + Chlorophyll + Temperature + NO3:PO4                 | 0.00781 | 6.27E-05 | 0.00796 | 0.664 | 0.12192 |
| NO3 + Chlorophyll + NO3:PO4 + Dist-to-shore                     | 0.00781 | 6.16E-05 | 0.00782 | 0.652 | 0.10051 |
| PO4 + Chlorophyll + Temperature                                 | 0.00781 | 5.79E-05 | 0.00735 | 0.613 | 0.07663 |
| NO3 + Chlorophyll + Temperature + NO3:PO4 + Dist-to-shore       | 0.00781 | 5.58E-05 | 0.00709 | 0.591 | 0.11927 |
| Chlorophyll + Temperature + NO3:PO4                             | 0.00781 | 5.17E-05 | 0.00656 | 0.547 | 0.07406 |
| Temperature                                                     | 0.00781 | 4.92E-05 | 0.00625 | 0.521 | 0.02056 |
| NO3 + PO4 + Temperature + NO3:PO4                               | 0.00781 | 4.41E-05 | 0.0056  | 0.467 | 0.09289 |
| NO3 + Temperature + NO3:PO4                                     | 0.00781 | 3.79E-05 | 0.00481 | 0.401 | 0.06695 |
| PO4 + Temperature                                               | 0.00781 | 3.69E-05 | 0.00469 | 0.391 | 0.04189 |
| Chlorophyll + NO3:PO4                                           | 0.00781 | 3.54E-05 | 0.00449 | 0.374 | 0.0409  |
| NO3 + PO4 + NO3:PO4                                             | 0.00781 | 3.39E-05 | 0.0043  | 0.358 | 0.06438 |
| NO3 + Chlorophyll + Temperature                                 | 0.00781 | 3.32E-05 | 0.00422 | 0.352 | 0.06396 |
| NO3:PO4                                                         | 0.00781 | 3.11E-05 | 0.00395 | 0.33  | 0.0102  |
| NO3 + Chlorophyll                                               | 0.00781 | 2.96E-05 | 0.00376 | 0.313 | 0.0368  |
| NO3                                                             | 0.00781 | 2.91E-05 | 0.0037  | 0.308 | 0.00866 |
| Chlorophyll + Temperature                                       | 0.00781 | 2.59E-05 | 0.00329 | 0.274 | 0.03373 |
| NO3 + Chlorophyll + Temperature + NO3:PO4                       | 0.00781 | 2.09E-05 | 0.00266 | 0.222 | 0.07558 |

|                             |         |          |         |       |         |
|-----------------------------|---------|----------|---------|-------|---------|
| NO3 + Chlorophyll + NO3:PO4 | 0.00781 | 1.34E-05 | 0.00171 | 0.142 | 0.04268 |
| NO3 + NO3:PO4               | 0.00781 | 9.59E-06 | 0.00122 | 0.102 | 0.0103  |

**Table S2.** Analysis of multiple linear regression

|               |             |            |          |           |                |
|---------------|-------------|------------|----------|-----------|----------------|
| ANOVA         |             |            |          |           |                |
| F:            | 4.3108      |            |          |           |                |
| df1, df2:     | 7, 125      |            |          |           |                |
| p:            | 0.00026435  |            |          |           |                |
|               | Coeff.      | Std.err.   | t        | p         | R <sup>2</sup> |
| Constant      | -0.20148    | 0.13491    | -1.4935  | 0.13784   |                |
| NO3           | 0.039961    | 0.044088   | 0.90637  | 0.36648   | 0.0011892      |
| PO4           | -0.078374   | 0.056472   | -1.3878  | 0.16766   | 0.031701       |
| Salinity      | -0.016637   | 0.0041157  | -4.0423  | 9.19E-05  | 0.098524       |
| Chlorophyll   | -0.013544   | 0.0092423  | -1.4654  | 0.14531   | 0.018774       |
| Temperature   | 0.027171    | 0.009087   | 2.9901   | 0.0033598 | 0.011058       |
| NO3:PO4       | -0.00064216 | 0.0006975  | -0.92067 | 0.359     | 0.0003015      |
| Dist-to-shore | 0.00066458  | 0.00040171 | 1.6544   | 0.10056   | 0.033759       |

**Table S3.** Analysis of variance ANOVA for current environmental variables

|                                |          |              |               |              |                  |
|--------------------------------|----------|--------------|---------------|--------------|------------------|
| <b>(A)</b>                     |          |              |               |              |                  |
|                                | Df       | Sum Sq       | Mean Sq       | F value      | Pr(>F)           |
| NO3                            | 1        | 0.011        | 0.0112        | 1.13         | 0.292            |
| <b>PO4</b>                     | <b>1</b> | <b>0.066</b> | <b>0.0659</b> | <b>6.64</b>  | <b>0.0126 *</b>  |
| <b>Salinity</b>                | <b>1</b> | <b>0.11</b>  | <b>0.1105</b> | <b>11.11</b> | <b>0.0015 **</b> |
| Chlorophyll                    | 1        | 0.023        | 0.023         | 2.31         | 0.134            |
| <b>Temperature</b>             | <b>1</b> | <b>0.039</b> | <b>0.039</b>  | <b>3.93</b>  | <b>0.0522 .</b>  |
| <b>NO3:PO4</b>                 | <b>1</b> | <b>0.05</b>  | <b>0.05</b>   | <b>5.03</b>  | <b>0.0288 *</b>  |
| <b>Dist-to-shore</b>           | <b>1</b> | <b>0.047</b> | <b>0.047</b>  | <b>4.73</b>  | <b>0.0337 *</b>  |
| NO3:PO4                        | 1        | 0            | 0.0001        | 0.01         | 0.9173           |
| NO3:Salinity                   | 1        | 0.002        | 0.0021        | 0.21         | 0.6486           |
| PO4:Salinity                   | 1        | 0.007        | 0.0069        | 0.69         | 0.4081           |
| NO3:Chlorophyll                | 1        | 0.003        | 0.0025        | 0.25         | 0.6178           |
| PO4:Chlorophyll                | 1        | 0.005        | 0.0053        | 0.54         | 0.4671           |
| Salinity:Chlorophyll           | 1        | 0.022        | 0.0223        | 2.25         | 0.1393           |
| <b>NO3:Temperature</b>         | <b>1</b> | <b>0.067</b> | <b>0.0666</b> | <b>6.7</b>   | <b>0.0122 *</b>  |
| PO4:Temperature                | 1        | 0.001        | 0.0014        | 0.15         | 0.7046           |
| Salinity:Temperature           | 1        | 0.015        | 0.0148        | 1.49         | 0.2277           |
| <b>Chlorophyll:Temperature</b> | <b>1</b> | <b>0.072</b> | <b>0.0722</b> | <b>7.27</b>  | <b>0.0092 **</b> |
| NO3:NO3:PO4                    | 1        | 0.004        | 0.0041        | 0.41         | 0.5243           |
| PO4:NO3:PO4                    | 1        | 0.001        | 0.0006        | 0.06         | 0.806            |
| Salinity:NO3:PO4               | 1        | 0.001        | 0.0009        | 0.09         | 0.7688           |

|                                                                      |          |              |               |             |                 |
|----------------------------------------------------------------------|----------|--------------|---------------|-------------|-----------------|
| Chlorophyll:NO3:PO4                                                  | 1        | 0.026        | 0.0256        | 2.57        | 0.1142          |
| Temperature:NO3:PO4                                                  | 1        | 0.009        | 0.0088        | 0.89        | 0.3499          |
| NO3:Dist-to-shore                                                    | 1        | 0.005        | 0.0045        | 0.45        | 0.5034          |
| PO4:Dist-to-shore                                                    | 1        | 0.004        | 0.0045        | 0.45        | 0.5044          |
| Salinity:Dist-to-shore                                               | 1        | 0.007        | 0.007         | 0.7         | 0.4048          |
| <b>Chlorophyll:Dist-to-shore</b>                                     | <b>1</b> | <b>0.046</b> | <b>0.0456</b> | <b>4.59</b> | <b>0.0364 *</b> |
| Temperature:Dist-to-shore                                            | 1        | 0.001        | 0.0007        | 0.07        | 0.7876          |
| NO3:PO4:Dist-to-shore                                                | 1        | 0.002        | 0.0016        | 0.16        | 0.6905          |
| NO3:PO4:Salinity                                                     | 1        | 0            | 0.0001        | 0.01        | 0.9325          |
| NO3:PO4:Chlorophyll                                                  | 1        | 0.019        | 0.0186        | 1.87        | 0.1771          |
| NO3:Salinity:Chlorophyll                                             | 1        | 0.001        | 0.0012        | 0.13        | 0.7246          |
| <b>PO4:Salinity:Chlorophyll</b>                                      | <b>1</b> | <b>0.031</b> | <b>0.0313</b> | <b>3.15</b> | <b>0.0814 .</b> |
| NO3:PO4:Temperature                                                  | 1        | 0.002        | 0.0024        | 0.25        | 0.6217          |
| NO3:Salinity:Temperature                                             | 1        | 0.008        | 0.0083        | 0.84        | 0.3634          |
| PO4:Salinity:Temperature                                             | 1        | 0.006        | 0.0063        | 0.64        | 0.4281          |
| NO3:Chlorophyll:Temperature                                          | 1        | 0            | 0             | 0           | 0.9848          |
| PO4:Chlorophyll:Temperature                                          | 1        | 0            | 0.0004        | 0.04        | 0.8417          |
| Salinity:Chlorophyll:Temperature                                     | 1        | 0.004        | 0.0045        | 0.45        | 0.504           |
| NO3:PO4:NO3:PO4                                                      | 1        | 0.003        | 0.0033        | 0.33        | 0.568           |
| NO3:Salinity:NO3:PO4                                                 | 1        | 0            | 0.0004        | 0.04        | 0.8475          |
| Residuals                                                            | 58       | 0.576        | 0.0099        |             |                 |
| <b>Signif. codes: 0 '***' 0.001 '**' 0.01 '*' 0.05 '.' 0.1 ' ' 1</b> |          |              |               |             |                 |

|                                                                      |     |        |         |         |           |
|----------------------------------------------------------------------|-----|--------|---------|---------|-----------|
| <b>B</b>                                                             |     |        |         |         |           |
| Response: Nodularin (ug l <sup>-1</sup> )                            |     |        |         |         |           |
|                                                                      | Df  | Sum Sq | Mean Sq | F value | Pr(>F)    |
| <i>Nodularia spumigena</i>                                           | 1   | 0.115  | 0.1154  | 8.51    | 0.0042 ** |
| Residuals                                                            | 131 | 1.776  | 0.0136  |         |           |
| <b>Signif. codes: 0 '***' 0.001 '**' 0.01 '*' 0.05 '.' 0.1 ' ' 1</b> |     |        |         |         |           |

**Table S4.** Results of the analysis of Bayesian linear regression for current environmental variables obtained from Swedish National Oceanographic Data Centre (NODC) at SMHI

| Model Comparison                                                          |         |           |      |      |                |
|---------------------------------------------------------------------------|---------|-----------|------|------|----------------|
| Models                                                                    | P(M)    | P(M data) | BFM  | BF10 | R <sup>2</sup> |
| Null model                                                                | 0.00781 | 0.0205    | 2.66 | 1    | 0              |
| Temperature + Dist-to-shore                                               | 0.00781 | 0.041     | 5.43 | 2    | 0.0716         |
| salinity + Temperature + Dist-to-shore                                    | 0.00781 | 0.0313    | 4.1  | 1.53 | 0.089          |
| PO <sub>4</sub> + Dist-to-shore                                           | 0.00781 | 0.0266    | 3.48 | 1.3  | 0.0631         |
| Temperature + Dist-to-shore + NO <sub>3</sub> :PO <sub>4</sub>            | 0.00781 | 0.0264    | 3.44 | 1.29 | 0.0856         |
| Dist-to-shore                                                             | 0.00781 | 0.0252    | 3.28 | 1.23 | 0.0363         |
| salinity + Temperature + Dist-to-shore + NO <sub>3</sub> :PO <sub>4</sub> | 0.00781 | 0.0233    | 3.03 | 1.13 | 0.1039         |
| NO <sub>3</sub> + Dist-to-shore + NO <sub>3</sub> :PO <sub>4</sub>        | 0.00781 | 0.0224    | 2.91 | 1.09 | 0.0824         |
| Temperature + chl <sub>a</sub> + Dist-to-shore                            | 0.00781 | 0.0221    | 2.88 | 1.08 | 0.0822         |

|                                                                               |          |          |         |              |             |                       |         |
|-------------------------------------------------------------------------------|----------|----------|---------|--------------|-------------|-----------------------|---------|
| salinity + NO <sub>3</sub> + Dist-to-shore + NO <sub>3</sub> :PO <sub>4</sub> |          | 0.00781  | 0.0208  | 2.7          | 1.01        | 0.1017                |         |
| Posterior Summaries of Coefficients                                           |          |          |         |              |             |                       |         |
|                                                                               |          |          |         |              |             | 95% Credible Interval |         |
| Coefficient                                                                   | Mean     | SD       | P(incl) | P(incl data) | BFinclusion | Lower                 | Upper   |
| Intercept                                                                     | 0.091    | 0.01146  | 1       | 1            | 1           | 0.0683                | 0.1137  |
| Temperature                                                                   | 0.00415  | 0.00219  | 0.5     | 0.48         | 0.922       | -1.87e-4              | 0.00848 |
| Dist-to-shore                                                                 | 7.60E-04 | 3.52E-04 | 0.5     | 0.751        | 3.01        | 6.30E-05              | 0.00146 |

**Table S5.** Analysis of (A) variance ANOVA and (B) multiple linear regression for future environmental variables

|                                                                 |          |              |               |              |                     |
|-----------------------------------------------------------------|----------|--------------|---------------|--------------|---------------------|
| <b>(A)</b>                                                      |          |              |               |              |                     |
| Response: Nodularin (ug l <sup>-1</sup> )                       |          |              |               |              |                     |
|                                                                 | Df       | Sum Sq       | Mean Sq       | F value      | Pr(>F)              |
| <b>SSP5.85_Chlorophyll</b>                                      | <b>1</b> | <b>0.126</b> | <b>0.1263</b> | <b>10.33</b> | <b>0.0019**</b>     |
| <b>SSP5.85_NO3</b>                                              | <b>1</b> | <b>0.31</b>  | <b>0.3099</b> | <b>25.33</b> | <b>0.0000033***</b> |
| SSP5.85_PO4                                                     | 1        | 0.02         | 0.0204        | 1.67         | 0.2008              |
| SSP5.85_Temperature                                             | 1        | 0.025        | 0.0249        | 2.04         | 0.1576              |
| SSP5.85_Salinity                                                | 1        | 0.016        | 0.0162        | 1.32         | 0.254               |
| SSP5.85_Chlorophyll:SSP5.85_NO3                                 | 1        | 0.005        | 0.0048        | 0.4          | 0.5313              |
| SSP5.85_Chlorophyll:SSP5.85_PO4                                 | 1        | 0.008        | 0.008         | 0.65         | 0.4209              |
| SSP5.85_NO3:SSP5.85_PO4                                         | 1        | 0.007        | 0.0067        | 0.55         | 0.46                |
| SSP5.85_Chlorophyll:SSP5.85_Temperature                         | 1        | 0.005        | 0.0047        | 0.39         | 0.5354              |
| SSP5.85_NO3:SSP5.85_Temperature                                 | 1        | 0.02         | 0.0202        | 1.65         | 0.2029              |
| <b>SSP5.85_PO4:SSP5.85_Temperature</b>                          | <b>1</b> | <b>0.034</b> | <b>0.0345</b> | <b>2.82</b>  | <b>0.0974.</b>      |
| SSP5.85_Chlorophyll:SSP5.85_Salinity                            | 1        | 0.007        | 0.0071        | 0.58         | 0.4489              |
| SSP5.85_NO3:SSP5.85_Salinity                                    | 1        | 0            | 0.0002        | 0.02         | 0.9019              |
| SSP5.85_PO4:SSP5.85_Salinity                                    | 1        | 0.026        | 0.0256        | 2.09         | 0.1522              |
| SSP5.85_Temperature:SSP5.85_Salinity                            | 1        | 0.005        | 0.0047        | 0.38         | 0.5371              |
| SSP5.85_Chlorophyll:SSP5.85_NO3:SSP5.85_PO4                     | 1        | 0.013        | 0.0129        | 1.05         | 0.3084              |
| SSP5.85_Chlorophyll:SSP5.85_NO3:SSP5.85_Temperature             | 1        | 0.019        | 0.0189        | 1.55         | 0.2175              |
| <b>SSP5.85_Chlorophyll:SSP5.85_PO4:SSP5.85_Temperature</b>      | <b>1</b> | <b>0.12</b>  | <b>0.1203</b> | <b>9.83</b>  | <b>0.0025**</b>     |
| SSP5.85_NO3:SSP5.85_PO4:SSP5.85_Temperature                     | 1        | 0.001        | 0.0007        | 0.06         | 0.8101              |
| SSP5.85_Chlorophyll:SSP5.85_NO3:SSP5.85_Salinity                | 1        | 0            | 0.0002        | 0.01         | 0.9118              |
| SSP5.85_Chlorophyll:SSP5.85_PO4:SSP5.85_Salinity                | 1        | 0.003        | 0.0027        | 0.22         | 0.6415              |
| SSP5.85_NO3:SSP5.85_PO4:SSP5.85_Salinity                        | 1        | 0.007        | 0.0069        | 0.57         | 0.4536              |
| SSP5.85_Chlorophyll:SSP5.85_Temperature:SSP5.85_Salinity        | 1        | 0            | 0             | 0            | 0.9773              |
| SSP5.85_NO3:SSP5.85_Temperature:SSP5.85_Salinity                | 1        | 0.001        | 0.0005        | 0.04         | 0.8343              |
| SSP5.85_PO4:SSP5.85_Temperature:SSP5.85_Salinity                | 1        | 0.009        | 0.0092        | 0.75         | 0.3896              |
| SSP5.85_Chlorophyll:SSP5.85_NO3:SSP5.85_PO4:SSP5.85_Temperature | 1        | 0.001        | 0.0011        | 0.09         | 0.765               |
| SSP5.85_Chlorophyll:SSP5.85_NO3:SSP5.85_PO4:SSP5.85_Salinity    | 1        | 0            | 0.0001        | 0.01         | 0.926               |

|                                                                                  |   |       |        |      |        |
|----------------------------------------------------------------------------------|---|-------|--------|------|--------|
| SSP5.85_Chlorophyll:SSP5.85_NO3:SSP5.85_Temperature:SSP5.85_Salinity             | 1 | 0     | 0      | 0    | 0.9585 |
| SSP5.85_Chlorophyll:SSP5.85_PO4:SSP5.85_Temperature:SSP5.85_Salinity             | 1 | 0.001 | 0.0009 | 0.08 | 0.7816 |
| SSP5.85_NO3:SSP5.85_PO4:SSP5.85_Temperature:SSP5.85_Salinity                     | 1 | 0.005 | 0.0047 | 0.39 | 0.5354 |
| SSP5.85_Chlorophyll:SSP5.85_NO3:SSP5.85_PO4:SSP5.85_Temperature:SSP5.85_Salinity | 1 | 0.002 | 0.0016 | 0.13 | 0.7216 |
| Residuals                                                                        | 7 |       |        |      |        |
|                                                                                  | 4 | 0.905 | 0.0122 |      |        |
| <b>Signif. codes: 0 '***' 0.001 '**' 0.01 '*' 0.05 '.' 0.1 ' ' 1</b>             |   |       |        |      |        |

|                               |                              |          |          |          |                |  |
|-------------------------------|------------------------------|----------|----------|----------|----------------|--|
| (B)                           |                              |          |          |          |                |  |
| Dependent variable:           | Nodularin ug l <sup>-1</sup> |          |          |          |                |  |
| N:                            | 133                          |          |          |          |                |  |
| Multiple R:                   | 0.51295                      |          |          |          |                |  |
| Multiple R <sup>2</sup> :     | 0.26312                      |          |          |          |                |  |
| Multiple R <sup>2</sup> adj.: | 0.23411                      |          |          |          |                |  |
|                               |                              |          |          |          |                |  |
| ANOVA                         |                              |          |          |          |                |  |
| F:                            | 9.0696                       |          |          |          |                |  |
| df1, df2:                     | 5, 127                       |          |          |          |                |  |
| p:                            | 2.14E-07                     |          |          |          |                |  |
|                               | Coeff.                       | Std.err. | t        | p        | R <sup>2</sup> |  |
| Constant                      | -0.12014                     | 0.17891  | -0.67148 | 0.50314  |                |  |
| SSP5.85_Chlorophyll           | 0.042264                     | 0.10213  | 0.41381  | 0.67971  | 0.066783       |  |
| SSP5.85_NO3                   | -0.06556                     | 0.032158 | -2.0387  | 0.043559 | 0.22767        |  |
| SSP5.85_PO4                   | -1.1626                      | 0.66409  | -1.7507  | 0.08241  | 0.003905       |  |
| SSP5.85_Temperature           | 0.035092                     | 0.018138 | 1.9347   | 0.055253 | 0.000138       |  |
| SSP5.85_Salinity              | -0.00364                     | 0.002995 | -1.2139  | 0.22706  | 0.17228        |  |

**Table S6.** Tables show the evaluation for (a) current and (b) future ensemble modeling for Nodularin.

|           |           |               |             |             |               |           |             |
|-----------|-----------|---------------|-------------|-------------|---------------|-----------|-------------|
| <b>A</b>  |           |               |             |             |               |           |             |
| threshold | AUC       | Omission rate | sensitivity | specificity | prop. correct | Kappa     | calibration |
| 0.3592846 | 0.8479378 | 0.262298      | 0.8126494   | 0.7180826   | 0.737702      | 0.4003372 | 0.3778409   |
| <b>B</b>  |           |               |             |             |               |           |             |
| threshold | AUC       | Omission rate | sensitivity | specificity | prop. correct | Kappa     | calibration |
| 0.3640084 | 0.8029785 | 0.2828693     | 0.7670442   | 0.7143419   | 0.7171307     | 0.3451057 | 0.4031681   |
